# Supplementary material for: The amelioration of a purified Pleurotus abieticola polysaccharide on atherosclerosis in ApoE−/− mice
Source: Royal Society of Chemistry journal article supplement (doi:10.1039/d3fo02740f), 2023-11-13
Supplement: d3fo02740f1.pdf [file d3fo02740f1.pdf]

## Supplementary information

### The amelioration of purified *Pleurotus abieticola* polysaccharide on atherosclerosis in ApoE<sup>-/-</sup> mice

Lei Xing<sup>† a, b</sup>, Fange Kong<sup>† a, b</sup>, Chunxia Wang<sup>a, b</sup>, Lanzhou Li<sup>a, b</sup>, Shichao Peng<sup>a, b</sup>, Di Wang<sup>\* a</sup>, Changtian Li<sup>\* a</sup>

*a* Engineering Research Center of Chinese Ministry of Education for Edible and Medicinal Fungi, Jilin Agricultural University, Changchun, 130118, China.

*b* College of Plant Protection, Jilin Agricultural University, Changchun, 130118, China.

#### Corresponding author:

Changtian Li, Ph.D., Professor;

Di Wang, Ph.D., Professor;

Engineering Research Center of Chinese Ministry of Education for Edible and Medicinal Fungi, Jilin Agricultural University

Changchun City, Jilin Province, P.R.China.

Email: [lct@jlau.edu.cn](mailto:lct@jlau.edu.cn)

Email: [wangdi@jlau.edu.cn](mailto:wangdi@jlau.edu.cn)

† These authors contributed equally to this work.

Lei Xing (L.X.), Email: [xl@mails.jlau.edu.cn](mailto:xl@mails.jlau.edu.cn)

Fange Kong (F.K.), Email: [kongfange@mails.jlau.edu.cn](mailto:kongfange@mails.jlau.edu.cn)

Chunxia Wang (C. W.), Email: [wangchunxia@mails.jlau.edu.cn](mailto:wangchunxia@mails.jlau.edu.cn)

Lanzhou Li (L.L.), Email: [lilanzhou@jlau.edu.cn](mailto:lilanzhou@jlau.edu.cn)

Shichao Peng (S.P.), Email: [pengshichao@mails.jlau.edu.cn](mailto:pengshichao@mails.jlau.edu.cn)

### Methods for determination of UV–Vis and FT-IR

The ultraviolet–visible (UV–Vis) spectrum was used to analyze the presence of proteins and nucleic acids in PAPS2 <sup>1</sup>. Fourier transform infrared spectroscopy (FT-IR) was used to identify the functional groups of PAPS2 <sup>2</sup>.

### References

1. S. Teng, Y. Zhang, X. Jin, Y. Zhu, L. Li, X. Huang, D. Wang and Z. Lin, Structure and hepatoprotective activity of Usp10/NF- $\kappa$ B/Nrf2 pathway-related *Morchella esculenta* polysaccharide, *Carbohydrate Polymers*, 2023, **303**, 120453.
2. X. Zhang, Z. Cai, H. Mao, P. Hu and X. Li, Isolation and structure elucidation of polysaccharides from fruiting bodies of mushroom *Coriolus versicolor* and evaluation of their immunomodulatory effects, *International Journal of Biological Macromolecules*, 2021, **166**, 1387-1395.

## Table list

**Table S1 Detail information of antibodies used in western blot.**

| Antibody                                                   | Molecular weight | Catalog number | Dilution |
|------------------------------------------------------------|------------------|----------------|----------|
| Anti-Nrf2 <sup>b</sup>                                     | 100 kDa          | a1244          | 1:1000   |
| Anti-SOD2 <sup>b</sup>                                     | 16kDa            | A1340          | 1:1000   |
| Anti-HO-1 <sup>c</sup>                                     | 33kDa            | AF5393         | 1:1000   |
| Anti-TLR4 <sup>b</sup>                                     | 110k Da          | A11226         | 1:1000   |
| Anti- NF- $\kappa$ B p65<br>(phosphor Ser536) <sup>c</sup> | 65kDa            | AF2006         | 1:1000   |
| Anti-NF- $\kappa$ B <sup>a</sup>                           | 60 kDa           | ab32536        | 1:1000   |
| Anti-IL-6 <sup>d</sup>                                     | 23 kDa           | bs-0782R       | 1:1000   |
| Anti-TNF- $\alpha$ <sup>b</sup>                            | 25 kDa           | A0277          | 1:1000   |
| Anti-NLRP3 <sup>b</sup>                                    | 110 kDa          | A5652          | 1:1000   |
| Anti-IL-1 $\beta$ <sup>b</sup>                             | 17 kDa           | A16288         | 1:1000   |
| Anti-IL-18 <sup>b</sup>                                    | 22 kDa           | A1115          | 1:1000   |
| Anti-GAPDH <sup>e</sup>                                    | 37 kDa           | E-AB-48016     | 1:4000   |
| goat anti-mouse <sup>e</sup>                               |                  | E-AB-1001      | 1:4000   |
| goat anti- rabbit <sup>e</sup>                             |                  | E-AB-1003      | 1:4000   |

<sup>a</sup> Abcam, Cambridge, MA, USA; <sup>b</sup> Wuhan ABclonal Technology Co., Ltd., Wuhan, Hubei, China; <sup>c</sup> Affinity Biosciences, Cincinnati, OH, USA; <sup>d</sup> Beijing bioss Biotechnology Co., Ltd, Beijing, China; <sup>e</sup> Elabscience Biotechnology Co., Ltd., Wuhan, China.

**Table S2 Molecular characteristics of PAPS2.**

| <b>Polydispersity</b>                           |        |
|-------------------------------------------------|--------|
| Mw/Mn                                           | 1.750  |
| Mz/Mn                                           | 14.293 |
| <b>Molar mass moments (10<sup>4</sup>g/mol)</b> |        |
| Mn                                              | 1.122  |
| Mp                                              | 0.763  |
| Mw                                              | 1.964  |
| Mz                                              | 16.040 |

Note: Mn: number-average molecular weight; Mp: peak molecular weight; Mw: weight-average molecular weight; Mz: Z-average molecular weight.

**Table S3 The information on the standard monosaccharide mixture and the results of the monosaccharide composition of PAPS2.**

| <b>Composition of standard monosaccharide mixture</b> |                       |                     |                             |            |                       |                     |                             |
|-------------------------------------------------------|-----------------------|---------------------|-----------------------------|------------|-----------------------|---------------------|-----------------------------|
| <b>No.</b>                                            | <b>Monosaccharide</b> | <b>Abbreviation</b> | <b>Retention time (min)</b> | <b>No.</b> | <b>Monosaccharide</b> | <b>Abbreviation</b> | <b>Retention time (min)</b> |
| 1                                                     | Fucose                | Fuc                 | 3.7668                      | 8          | Fructose              | Fru                 | 16.4002                     |
| 2                                                     | Rhamnose              | Rha                 | 8.0252                      | 9          | Ribose                | Rib                 | 17.5418                     |
| 3                                                     | Arabinose             | Ara                 | 8.3502                      | 10         | Galacturonic Acid     | Gal-UA              | 33.0585                     |
| 4                                                     | Galactose             | Gal                 | 9.9335                      | 11         | Glucuronic Acid       | Glc-UA              | 33.5252                     |
| 5                                                     | Glucose               | Glc                 | 11.7585                     | 12         | Mannuronic Acid       | Man-UA              | 35.1502                     |
| 6                                                     | Xylose                | Xyl                 | 13.8168                     | 13         | Guluronic Acid        | Gul-UA              | 37.0168                     |
| 7                                                     | Mannose               | Man                 | 14.8252                     |            |                       |                     |                             |

  

| <b>Monosaccharide composition of PAPS2</b> |                       |                     |                    |            |                       |                     |                    |
|--------------------------------------------|-----------------------|---------------------|--------------------|------------|-----------------------|---------------------|--------------------|
| <b>No.</b>                                 | <b>Monosaccharide</b> | <b>Abbreviation</b> | <b>Content (%)</b> | <b>No.</b> | <b>Monosaccharide</b> | <b>Abbreviation</b> | <b>Content (%)</b> |
| 1                                          | Fucose                | Fuc                 | 2.5                | 4          | Mannose               | Man                 | 26.20              |
| 2                                          | Galactose             | Gal                 | 37.98              | 5          | Glucuronic Acid       | Glc-UA              | 1.8                |
| 3                                          | Glucose               | Glc                 | 31.45              |            |                       |                     |                    |

**Table S4** Dominant nodes of intestinal flora in mice

| Group | Taxa                                                                                                                                      | Abundance | LDA_score | P value |
|-------|-------------------------------------------------------------------------------------------------------------------------------------------|-----------|-----------|---------|
| HFD   | Bacteria.Firmicutes.Clostridia.Clostridiales.Lachnospiraceae._ <i>Ruminococcus</i> _                                                      | 4.23      | 3.83      | 0.018   |
| HFD   | Bacteria.Firmicutes.Bacilli.Turicibacterales.Turicibacteraceae. <i>Turicibacter</i>                                                       | 4.60      | 4.27      | 0.012   |
| HFD   | Bacteria.Firmicutes.Bacilli.Turicibacterales                                                                                              | 4.60      | 4.29      | 0.012   |
| HFD   | <b>Bacteria.Firmicutes.Clostridia.Clostridiales.Lachnospiraceae._<i>Ruminococcus</i>_._<i>Ruminococcus</i>_</b><br><b><i>gnavus</i></b>   | 4.23      | 3.82      | 0.018   |
| HFD   | Bacteria.Firmicutes.Clostridia                                                                                                            | 5.75      | 5.21      | 0.024   |
| HFD   | Bacteria.Firmicutes.Clostridia.Clostridiales.Lachnospiraceae                                                                              | 5.47      | 5.01      | 0.023   |
| HFD   | Bacteria.Firmicutes.Bacilli.Turicibacterales.Turicibacteraceae                                                                            | 4.60      | 4.29      | 0.012   |
| HFD   | Bacteria.Firmicutes.Clostridia.Clostridiales                                                                                              | 5.75      | 5.23      | 0.024   |
| Ctrl  | Bacteria.Actinobacteria.Actinobacteria.Bifidobacteriales.Bifidobacteriaceae. <i>Bifidobacterium</i> . <i>Bifidobacterium_pseudolongum</i> | 3.58      | 3.35      | 0.010   |
| Ctrl  | Bacteria.Firmicutes.Bacilli.Bacillales.Staphylococcaceae. <i>Salinicoccus</i>                                                             | 2.35      | 3.84      | 0.024   |
| Ctrl  | Bacteria.Firmicutes.Bacilli.Lactobacillales.Aerococcaceae. <i>Atopostipes</i>                                                             | 3.26      | 3.22      | 0.005   |
| Ctrl  | Bacteria.Proteobacteria.Gammaproteobacteria                                                                                               | 2.97      | 3.50      | 0.031   |
| Ctrl  | Bacteria.Actinobacteria.Actinobacteria                                                                                                    | 4.27      | 3.96      | 0.012   |
| Ctrl  | Bacteria.Firmicutes.Bacilli.Lactobacillales.Aerococcaceae                                                                                 | 4.17      | 3.86      | 0.010   |
| Ctrl  | Bacteria.Bacteroidetes                                                                                                                    | 5.45      | 4.94      | 0.024   |
| Ctrl  | Bacteria.Firmicutes.Bacilli.Bacillales.Planococcaceae                                                                                     | 3.84      | 3.59      | 0.022   |
| Ctrl  | Bacteria.Bacteroidetes.Bacteroidia.Bacteroidales.Bacteroidaceae                                                                           | 3.69      | 3.44      | 0.026   |
| Ctrl  | Bacteria.Firmicutes.Bacilli.Bacillales                                                                                                    | 5.50      | 5.24      | 0.025   |
| Ctrl  | Bacteria.Actinobacteria.Actinobacteria.Actinomycetales.Corynebacteriaceae                                                                 | 4.16      | 3.85      | 0.017   |
| Ctrl  | Bacteria.Bacteroidetes.Bacteroidia                                                                                                        | 5.45      | 4.94      | 0.024   |
| Ctrl  | Bacteria.Firmicutes.Bacilli.Bacillales.Staphylococcaceae. <i>Jeotgalicoccus</i> . <i>Jeotgalicoccus_psychrophilus</i>                     | 3.48      | 3.25      | 0.044   |
| Ctrl  | Bacteria.Proteobacteria.Gammaproteobacteria.Pseudomonadales.Moraxellaceae                                                                 | 2.30      | 3.73      | 0.048   |

|      |                                                                                                                                               |      |      |       |
|------|-----------------------------------------------------------------------------------------------------------------------------------------------|------|------|-------|
| Ctrl | Bacteria.Firmicutes.Bacilli.Lactobacillales.Aerococcaceae. <i>Atopostipes</i> . <i>Atopostipes_suicloacalis</i>                               | 3.26 | 3.73 | 0.005 |
| Ctrl | Bacteria.Firmicutes.Bacilli.Lactobacillales.Aerococcaceae. <i>Facklamia</i>                                                                   | 3.34 | 3.13 | 0.005 |
| Ctrl | Bacteria.Firmicutes.Bacilli.Bacillales.Staphylococcaceae                                                                                      | 5.43 | 5.13 | 0.025 |
| Ctrl | Bacteria.Actinobacteria.Actinobacteria.Actinomycetales. <i>Corynebacteriaceae</i> . <i>Corynebacterium</i>                                    | 4.16 | 3.86 | 0.017 |
| Ctrl | Bacteria.Firmicutes.Bacilli.Bacillales.Staphylococcaceae. <i>Staphylococcus</i> . <i>Staphylococcus_sciuri</i>                                | 4.45 | 4.17 | 0.020 |
| Ctrl | Bacteria.Bacteroidetes.Bacteroidia.Bacteroidales                                                                                              | 5.45 | 4.92 | 0.024 |
| Ctrl | Bacteria.Actinobacteria.Actinobacteria.Bifidobacteriales.Bifidobacteriaceae. <i>Bifidobacterium</i> . <i>Bifidobacterium_bifidum</i>          | 2.12 | 3.60 | 0.005 |
| Ctrl | Bacteria.Actinobacteria.Actinobacteria.Actinomycetales. <i>Corynebacteriaceae</i> . <i>Corynebacterium</i> . <i>Corynebacterium_stationis</i> | 4.15 | 3.84 | 0.012 |
| Ctrl | Bacteria.Firmicutes.Erysipelotrichi.Erysipelotrichales.Erysipelotrichaceae. <i>Clostridium</i>                                                | 2.94 | 3.87 | 0.009 |
| Ctrl | Bacteria.Firmicutes.Erysipelotrichi.Erysipelotrichales.Erysipelotrichaceae. <i>Clostridium</i> . <i>Clostridium_cleatum</i>                   | 2.86 | 3.99 | 0.009 |
| Ctrl | Bacteria.Firmicutes.Bacilli.Bacillales.Planococcaceae. <i>Sporosarcina</i>                                                                    | 2.82 | 3.42 | 0.015 |
| Ctrl | Bacteria.Firmicutes.Bacilli.Bacillales.Planococcaceae. <i>Staphylococcus</i> . <i>Staphylococcus_saprophyticus</i>                            | 3.77 | 3.51 | 0.022 |
| Ctrl | Bacteria.Firmicutes.Bacilli                                                                                                                   | 5.55 | 5.17 | 0.037 |
| Ctrl | Bacteria.Firmicutes.Bacilli.Bacillales.Staphylococcaceae. <i>Jeotgalicoccus</i>                                                               | 3.48 | 3.18 | 0.044 |
| Ctrl | Bacteria.Firmicutes.Bacilli.Bacillales.Staphylococcaceae. <i>Staphylococcus</i>                                                               | 5.42 | 5.13 | 0.023 |
| Ctrl | Bacteria.Actinobacteria.Actinobacteria.Bifidobacteriales                                                                                      | 3.61 | 3.42 | 0.017 |
| Ctrl | Bacteria.Proteobacteria.Gammaproteobacteria.Pseudomonadales                                                                                   | 2.30 | 3.77 | 0.048 |
| Ctrl | Bacteria.Bacteroidetes.Bacteroidia.Bacteroidales.Bacteroidaceae. <i>Bacteroides</i>                                                           | 3.69 | 3.43 | 0.026 |
| Ctrl | Bacteria.Actinobacteria.Actinobacteria.Actinomycetales                                                                                        | 4.16 | 3.84 | 0.023 |
| Ctrl | Bacteria.Bacteroidetes.Bacteroidia.Bacteroidales.Bacteroidaceae. <i>Bacteroides</i> . <i>Bacteroides_acidifaciens</i>                         | 3.50 | 3.22 | 0.043 |
| Ctrl | Bacteria.Bacteroidetes.Bacteroidia.Bacteroidales.Porphyrimonadaceae. <i>Parabacteroides</i>                                                   | 3.35 | 3.14 | 0.048 |
| Ctrl | Bacteria.Actinobacteria.Actinobacteria.Bifidobacteriales.Bifidobacteriaceae                                                                   | 3.61 | 3.41 | 0.017 |
| Ctrl | Bacteria.Bacteroidetes.Bacteroidia.Bacteroidales._Odoribacteraceae_                                                                           | 4.06 | 3.70 | 0.015 |

|           |                                                                                                                              |      |      |       |
|-----------|------------------------------------------------------------------------------------------------------------------------------|------|------|-------|
| Ctrl      | Bacteria.Bacteroidetes.Bacteroidia.Bacteroidales._Odoribacteraceae_. <i>Odoribacter</i>                                      | 4.06 | 3.72 | 0.015 |
| Ctrl      | Bacteria.Actinobacteria.Actinobacteria.Bifidobacteriales.Bifidobacteriaceae. <i>Bifidobacterium</i>                          | 3.61 | 3.37 | 0.017 |
| Ctrl      | Bacteria.Firmicutes.Bacilli.Gemellales                                                                                       | 2.93 | 3.14 | 0.009 |
| Ctrl      | Bacteria.Firmicutes.Bacilli.Bacillales.Planococcaceae. <i>Staphylococcus</i>                                                 | 3.77 | 3.49 | 0.022 |
| Ctrl      | Bacteria.Bacteroidetes.Bacteroidia.Bacteroidales.Porphyromonadaceae                                                          | 3.35 | 3.14 | 0.048 |
| HFD+PAPS2 | Bacteria.Firmicutes.Erysipelotrichi.Erysipelotrichales.Erysipelotrichaceae. <i>Allobaculum</i>                               | 4.64 | 4.34 | 0.025 |
| HFD+PAPS2 | Bacteria.Deferribacteres                                                                                                     | 3.15 | 3.04 | 0.024 |
| HFD+PAPS2 | Bacteria.Firmicutes.Erysipelotrichi                                                                                          | 4.65 | 4.28 | 0.025 |
| HFD+PAPS2 | Bacteria.Firmicutes.Clostridia.Clostridiales.Lachnospiraceae. <i>Coprococcus</i>                                             | 4.29 | 3.90 | 0.021 |
| HFD+PAPS2 | <b>Bacteria.Firmicutes.Clostridia.Clostridiales.Lachnospiraceae.<i>Roseburia</i></b>                                         | 3.19 | 3.52 | 0.009 |
| HFD+PAPS2 | Bacteria.Deferribacteres.Deferribacteres.Deferribacterales.Deferribacteraceae                                                | 3.15 | 3.07 | 0.024 |
| HFD+PAPS2 | Bacteria.Firmicutes.Erysipelotrichi.Erysipelotrichales.Erysipelotrichaceae                                                   | 4.65 | 4.31 | 0.025 |
| HFD+PAPS2 | Bacteria.Firmicutes.Bacilli.Lactobacillales.Lactobacillaceae. <i>Lactobacillus.Lactobacillus_vaginalis</i>                   | 4.21 | 3.93 | 0.022 |
| HFD+PAPS2 | Bacteria.Deferribacteres.Deferribacteres.Deferribacterales.Deferribacteraceae. <i>Mucispirillum.Mucispirillum_schaedleri</i> | 3.15 | 3.03 | 0.024 |
| HFD+PAPS2 | Bacteria.Firmicutes.Erysipelotrichi.Erysipelotrichales                                                                       | 4.65 | 4.29 | 0.025 |
| HFD+PAPS2 | Bacteria.Deferribacteres.Deferribacteres                                                                                     | 3.15 | 3.04 | 0.024 |
| HFD+PAPS2 | Bacteria.Deferribacteres.Deferribacteres.Deferribacterales.Deferribacteraceae. <i>Mucispirillum</i>                          | 3.15 | 3.04 | 0.024 |
| HFD+PAPS2 | Bacteria.Deferribacteres.Deferribacteres.Deferribacterales                                                                   | 3.15 | 3.06 | 0.024 |

Data are presented as mean (n = 4) and were analyzed using a one-way ANOVA test followed by post-hoc Dunn's multiple comparison test. The size of dominant nodes was proportional to the relative abundance of the operational taxonomic units (measured as log 10 of median reads). The LDA score and p-value were calculated.



Table S5 Differential lipids in serum lipid metabolism in mice.

|    | name               | Class   | Normalized intensity ( $\times 10^6$ ) |        |           | HFD vs. Ctrl |         | HFD+PAPS2 vs. HFD |         |
|----|--------------------|---------|----------------------------------------|--------|-----------|--------------|---------|-------------------|---------|
|    |                    |         | Ctrl                                   | HFD    | HFD+PAPS2 | Fold change  | P value | Fold change       | P value |
| 1  | AcCa(12:1)         | AcCa    | 0.15                                   | 0.09   | 0.13      | 1.76         | 0.013   | 1.46              | 0.010   |
| 2  | BisMePA(20:5_18:2) | BisMePA | 0.47                                   | 0.05   | 0.10      | 9.91         | 0.004   | 2.14              | 0.048   |
| 3  | Cer(d38:0)         | Cer     | 0.44                                   | 0.25   | 0.33      | 1.74         | 0.035   | 1.29              | 0.045   |
| 4  | ChE(22:4)          | ChE     | 1.20                                   | 0.44   | 0.65      | 2.73         | 0.000   | 1.48              | 0.012   |
| 5  | CmE(18:2)          | CmE     | 1.88                                   | 0.83   | 1.51      | 2.26         | 0.005   | 1.82              | 0.000   |
| 6  | CmE(20:4)          | CmE     | 0.95                                   | 0.07   | 0.12      | 13.89        | 0.001   | 1.75              | 0.010   |
| 7  | CmE(22:6)          | CmE     | 0.82                                   | 0.06   | 0.08      | 13.35        | 0.000   | 1.37              | 0.036   |
| 8  | MePC(30:4e)        | MePC    | 0.04                                   | 0.02   | 0.03      | 2.26         | 0.037   | 1.68              | 0.046   |
| 9  | MePC(38:5)         | MePC    | 0.05                                   | 0.02   | 0.05      | 2.89         | 0.000   | 2.74              | 0.010   |
| 10 | PC(20:3)           | PC      | 0.19                                   | 0.07   | 0.25      | 2.74         | 0.013   | 3.67              | 0.034   |
| 11 | PC(33:5)           | PC      | 0.03                                   | 0.01   | 0.02      | 2.85         | 0.033   | 2.10              | 0.048   |
| 12 | PC(35:6)           | PC      | 0.73                                   | 0.07   | 0.16      | 9.91         | 0.004   | 2.14              | 0.048   |
| 13 | PC(38:4)           | PC      | 224.59                                 | 145.77 | 180.73    | 1.54         | 0.001   | 1.24              | 0.001   |
| 14 | PC(41:6)           | PC      | 0.43                                   | 0.28   | 0.45      | 1.54         | 0.025   | 1.62              | 0.038   |
| 15 | PE(16:1_18:2)      | PE      | 0.11                                   | 0.02   | 0.04      | 5.47         | 0.010   | 2.15              | 0.026   |
| 16 | SPH(d20:0)         | SPH     | 2.25                                   | 1.42   | 2.41      | 1.59         | 0.015   | 1.70              | 0.005   |
| 17 | SiE(20:4)          | SiE     | 2.07                                   | 0.76   | 1.13      | 2.72         | 0.000   | 1.49              | 0.013   |
| 18 | LPC(14:0)          | LPC     | 0.07                                   | 0.05   | 0.08      | 1.41         | 0.002   | 1.73              | 0.028   |
| 19 | LPC(18:3)          | LPC     | 0.48                                   | 0.30   | 0.47      | 1.62         | 0.005   | 1.59              | 0.032   |
| 20 | LdMePE(16:1)       | LdMePE  | 0.04                                   | 0.03   | 0.04      | 1.47         | 0.017   | 1.53              | 0.048   |
| 21 | PC(18:0_20:4)      | PC      | 9.44                                   | 6.62   | 8.85      | 1.43         | 0.005   | 1.34              | 0.039   |
| 22 | dMePE(18:1_18:2)   | dMePE   | 0.04                                   | 0.03   | 0.04      | 1.72         | 0.011   | 1.57              | 0.022   |
| 23 | BisMePA(30:1_18:1) | BisMePA | 0.05                                   | 0.14   | 0.06      | 0.32         | 0.018   | 0.40              | 0.033   |

| name | Class               | Normalized intensity ( $\times 10^6$ ) |      |           | HFD v.s. Ctrl |         | HFD+PAPS2 v.s HFD |         |       |
|------|---------------------|----------------------------------------|------|-----------|---------------|---------|-------------------|---------|-------|
|      |                     | Ctrl                                   | HFD  | HFD+PAPS2 | Fold change   | P value | Fold change       | P value |       |
| 24   | TG(18:0_16:0_16:0)  | TG                                     | 6.37 | 30.90     | 18.45         | 0.21    | 0.000             | 0.60    | 0.034 |
| 25   | TG(16:1_16:1_18:3)  | TG                                     | 0.27 | 0.40      | 0.30          | 0.68    | 0.031             | 0.76    | 0.040 |
| 26   | TG(16:0_17:0_18:1)  | TG                                     | 2.59 | 3.83      | 2.52          | 0.68    | 0.028             | 0.66    | 0.039 |
| 27   | TG(18:1e_16:0_18:1) | TG                                     | 0.03 | 3.20      | 1.44          | 0.01    | 0.001             | 0.45    | 0.020 |
| 28   | TG(16:0_18:1_19:0)  | TG                                     | 1.43 | 2.81      | 2.04          | 0.51    | 0.001             | 0.73    | 0.006 |
| 29   | TG(18:4_18:1_18:2)  | TG                                     | 0.55 | 1.39      | 0.98          | 0.39    | 0.000             | 0.70    | 0.004 |
| 30   | TG(20:0_16:0_20:4)  | TG                                     | 0.44 | 0.94      | 0.56          | 0.46    | 0.006             | 0.59    | 0.023 |
| 31   | TG(18:1_18:3_20:5)  | TG                                     | 0.27 | 0.46      | 0.33          | 0.58    | 0.001             | 0.72    | 0.006 |
| 32   | TG(16:0_20:1_21:0)  | TG                                     | 0.48 | 1.10      | 0.82          | 0.44    | 0.002             | 0.75    | 0.020 |
| 33   | TG(18:1_18:1_23:0)  | TG                                     | 0.78 | 1.64      | 1.11          | 0.48    | 0.003             | 0.68    | 0.031 |
| 34   | TG(60:5e)           | TG                                     | 0.43 | 3.54      | 1.68          | 0.12    | 0.000             | 0.47    | 0.000 |
| 35   | TG(25:1_18:1_18:1)  | TG                                     | 0.24 | 0.38      | 0.24          | 0.63    | 0.033             | 0.64    | 0.021 |
| 36   | TG(26:1_18:1_18:1)  | TG                                     | 0.38 | 0.92      | 0.54          | 0.42    | 0.005             | 0.59    | 0.017 |
| 37   | TG(28:1_18:1_18:2)  | TG                                     | 0.08 | 0.15      | 0.08          | 0.54    | 0.028             | 0.50    | 0.004 |
| 38   | TG(29:1_18:1_18:1)  | TG                                     | 0.07 | 0.29      | 0.22          | 0.24    | 0.000             | 0.74    | 0.035 |
| 39   | TG(30:1_18:1_18:2)  | TG                                     | 0.07 | 0.26      | 0.16          | 0.25    | 0.000             | 0.60    | 0.008 |
| 40   | TG(30:1_18:2_18:2)  | TG                                     | 0.03 | 0.06      | 0.01          | 0.53    | 0.033             | 0.21    | 0.004 |
| 41   | TG(26:1_18:2_24:2)  | TG                                     | 0.11 | 0.29      | 0.20          | 0.40    | 0.000             | 0.68    | 0.036 |
| 42   | TG(70:5)            | TG                                     | 0.06 | 0.19      | 0.10          | 0.31    | 0.001             | 0.55    | 0.044 |

Data were presented as mean (n=4). Statistically significant differences using a T-TEST ( $p < 0.05$ ) in metabolite levels and fold change  $\geq 1.5$  or  $\leq 0.667$  were regarded as the standard for differential lipids.

## Figure list

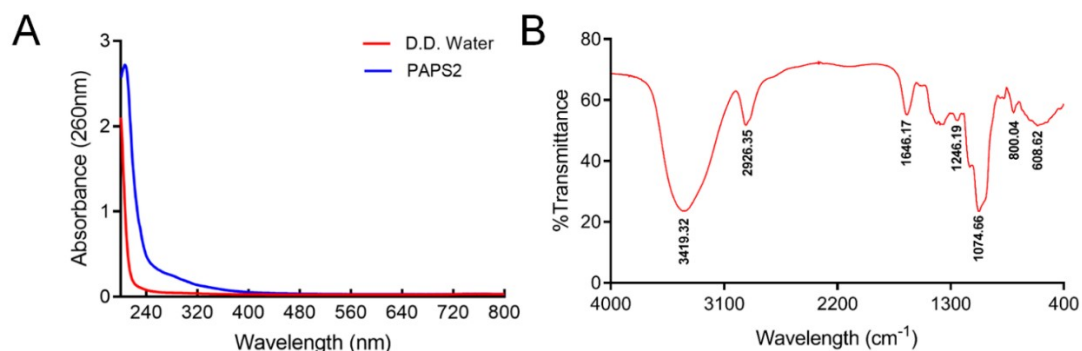

Fig. S 1 The UV-Vis and FT-IR spectrums of PAPS2. (A) The UV-Vis spectrum of PAPS2 at the wavelength range of 200–800 nm. The blue line represents PAPS2; the red line represents the negative control (D.D. water). (B) The FT-IR spectrum of PAPS2 at the wavelength range of 4000–400 cm<sup>-1</sup>.

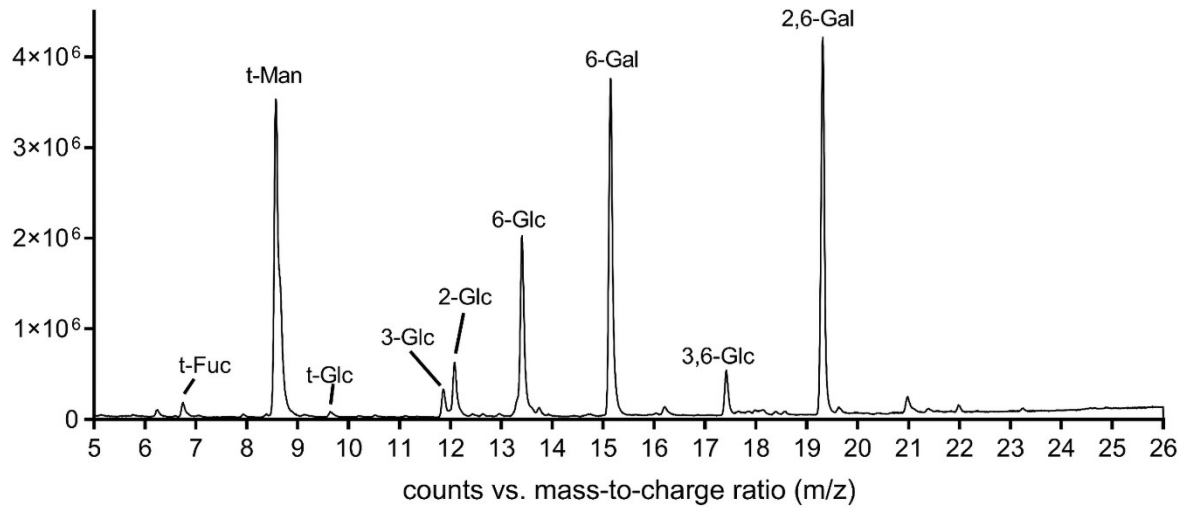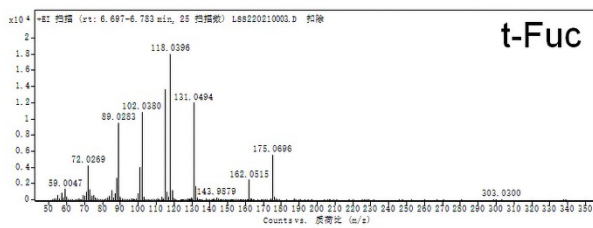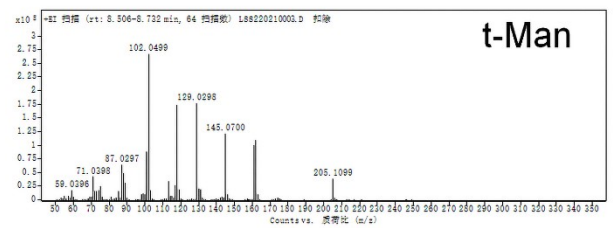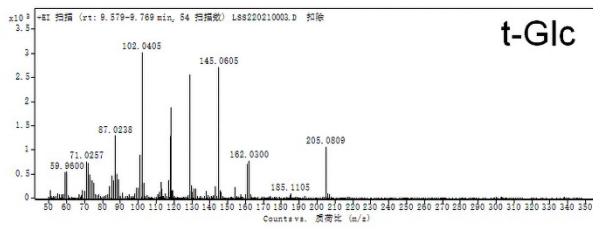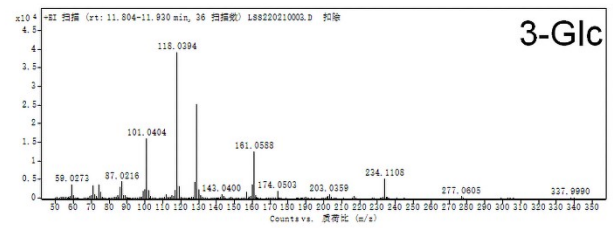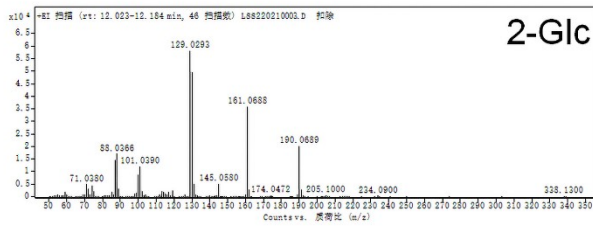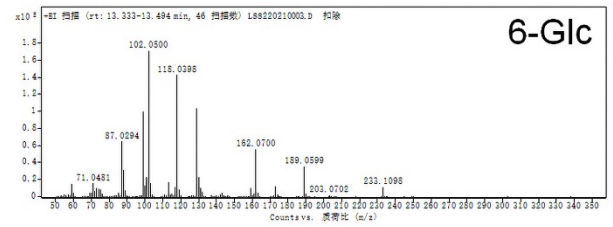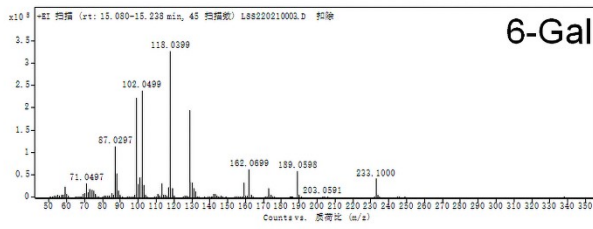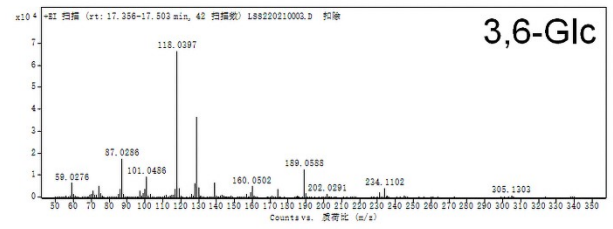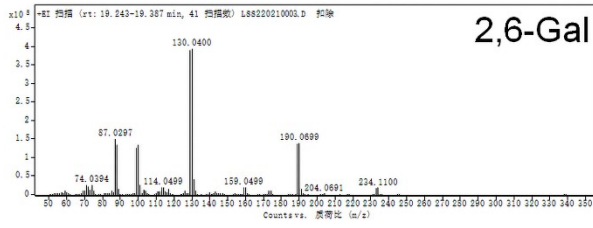

Fig. S2 Methylation GC-MS chart of PAPS2.

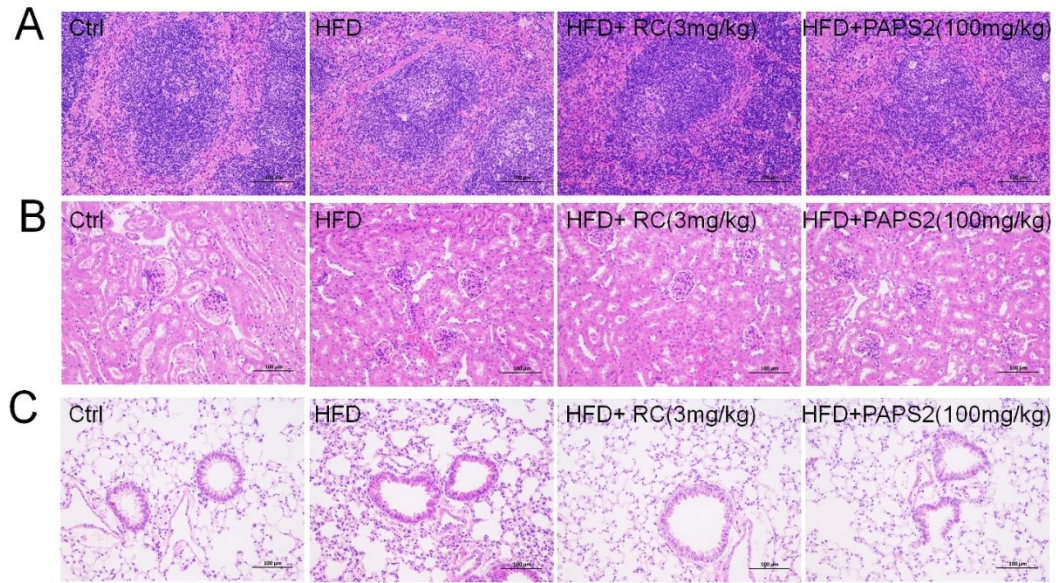

**Fig. S3** PAPS2 shows no significant effect on the (A) spleen and (B) kidney, and relived the inflammatory infiltration in (C) lungs in HFD-fed ApoE<sup>-/-</sup> mice (n=3).
